# Supplementary material for: Time changes during the last 40 years in the Solfatara magmatic–hydrothermal system (Campi Flegrei, Italy): new conceptual model and future scenarios
Source: Copernicus journal article supplement (doi:10.5194/se-16-551-2025), 2025-06-30
Supplement: Supplementary file 1 [file se-16-551-2025-supplement.zip]

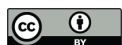

*Supplement of*

**Time changes during the last 40 years in the Solfatara magmatic–hydrothermal system (Campi Flegrei, Italy): new conceptual model and future scenarios**

**Luigi Marini et al.**

*Correspondence to:* Matteo Lelli (m.elli@igg.cnr.it)

- se-16-551-2025-supplement-title-page.pdf
- Supplement\_Table S1.xls

The copyright of individual parts of the supplement might differ from the article licence.
